# Supplementary material
Source: publisher site journal article supplement (https://www.dovepress.com/article/296680)
Supplement: Supplementary file 1 [file get_supplementary_file.php]

APPENDIX 1

Details about each database’s searching strategy

Pubmed： ((((((((Diets) OR diet[MeSH Terms]) OR foods) OR food[MeSH Terms])) OR (((((Life Styles) OR Lifestyle) OR Lifestyles) OR Life Style Induced Illness) OR Life Style[MeSH Terms])) OR nutrition[MeSH Terms])) AND ((((((((((((((((((Gastric Acid Reflux[Title/Abstract]) OR Acid Reflux, Gastric[Title/Abstract]) OR Reflux, Gastric Acid[Title/Abstract]) OR Gastric Acid Reflux Disease[Title/Abstract]) OR Gastro-Esophageal Reflux[Title/Abstract]) OR Gastro Esophageal Reflux[Title/Abstract]) OR Reflux, Gastro-Esophageal[Title/Abstract]) OR Gastroesophageal Reflux Disease[Title/Abstract]) OR GERD[Title/Abstract]) OR Reflux, Gastroesophageal[Title/Abstract]) OR Esophageal Reflux[Title/Abstract]) OR Gastro-oesophageal Reflux[Title/Abstract]) OR Gastro oesophageal Reflux[Title/Abstract]) OR Reflux, Gastro-oesophageal[Title/Abstract]) OR Gastroesophageal Reflux[MeSH Terms])) OR ((((((((((((((Barrett Metaplasia[Title/Abstract]) OR Barrett Metaplasias[Title/Abstract]) OR Metaplasia, Barrett[Title/Abstract]) OR Metaplasias, Barrett[Title/Abstract]) OR Barrett's Syndrome[Title/Abstract]) OR Barretts Syndrome[Title/Abstract]) OR Barrett Syndrome[Title/Abstract]) OR Barrett's Esophagus[Title/Abstract]) OR Barretts Esophagus[Title/Abstract]) OR Esophagus, Barrett's[Title/Abstract]) OR Esophagus, Barrett[Title/Abstract]) OR Barrett Epithelium[Title/Abstract]) OR Epithelium, Barrett[Title/Abstract]) OR Barrett Esophagus[MeSH Terms])) OR (((Pyrosis[Title/Abstract]) OR Pyroses[Title/Abstract]) OR heartburn[MeSH Terms])) Sort by: Best Match Filters: Publication date to 2020/03/01; Humans; English

Embase：('diets'/exp OR 'diets' OR 'food'/exp OR 'food' OR 'lifestyle modification'/exp OR 'lifestyle modification' OR 'lifestyle'/exp OR 'lifestyle' OR 'nutrition'/exp OR 'nutrition') AND ('gastroesophageal reflux'/mj OR 'barrett esophagus'/mj OR 'heartburn'/mj) AND [humans]/lim AND [english]/lim AND [1-1-1800]/sd NOT [2-3-2020]/sd

中国知网：检索时间3月14号。期刊检索，限定：核心期刊。

检索式：(((TI=胃 OR TI=食管) AND (TI=反流 OR TI=返流)) OR TI=巴雷特 OR TI=巴瑞特 OR TI=Barrett) and (AB=饮食 OR AB=食品 OR AB=食物 OR AB=膳食 OR AB=营养 OR AB=刺激性食物 OR AB=辣 OR AB=辣椒 OR AB=酸 OR AB=甜 OR AB=清淡 OR AB=咸 OR AB=盐 OR AB=高盐饮食 OR AB=腌制品 OR AB=纤维素 OR AB=油腻 OR AB=油脂 OR AB=脂肪 OR AB=煎炸 OR AB=碳水化合物 OR AB=蛋白质 OR AB=蛋白 OR AB=饮料 OR AB=碳酸饮料 OR AB=苏打水 OR AB=汽水 OR AB=烟 OR AB=茶 OR AB=酒 OR AB=锻炼 OR AB=运动 OR AB=养生 OR AB=生活方式 OR AB=危险因素)

中国生物医药数据库：检索时间3月14号。限定：核心期刊。

检索式：[(("Barrett食管"[不加权:扩展] OR Barrett食管) OR ("胃食管反流"[不加权:扩展] OR 胃食管反流)) AND (("生活方式"[不加权:扩展] OR 生活方式) OR ("膳食, 食品和营养"[不加权:扩展] OR 膳食，食品和营养))](javascript:toDoRelimitSearch();)

APPENDIX 2

**Appendix 2** Basic characteristic of each study.

| **First Author, publication year** | **Area (country)** | **Diagnosis standard** | **Sample size** | **Man/ Woman** | **Age(mean ± standard deviation)** | **Clinical Study design** |
| --- | --- | --- | --- | --- | --- | --- |
| I. Mone, 20168 | Western country (Albanian) | GERD: Based on the Montreal definition. | 817 | 333/484 | 50.1± 18.6 | cross-sectional study |
| Lulzim Çela, 20139 | Western country (Albanian) | GERD: Based on the Montreal definition. | 845 | 345/500 | 50.3±18.6 | cross-sectional study |
| Ai Kubo, 201423 | Western country（American) | GERD, BE: identified using the International Classification of Disease, Ninth Revision (ICD-9) . | 490 | 334/156 | NA | cross-sectional study |
| Frank K. Friedenberg, 201128 | Western country（American) | GERD:GERD symptoms ≥2 days per week that the subject considers troublesome or severe GERD symptoms ≥1 day per week that the subject considers troublesome. | 503 | 195/308 | 42.9±16.8 | cross-sectional study |
| Gawon Ju, 201336 | Eastern country（Korea) | GERD: Subjects reporting heartburn or acid regurgitation at least once a week were classified as having GERD. | 564 | 427/137 | 50.9 ± 13.5 | cross-sectional study |
| Yasuhiro Fujiwara, 200541 | Eastern country（Japan) | GERD: All patients were examined by esophago gastroduodenoscopy and the presence of esophageal mucosal break was assessed by the Los Angeles classification. | 441 | 258/183 | 54.5± 10.3 | case control study |
| Tetsuya Murao, 201143 | Eastern country（Japan) | GERD: Carlsson-Dent self-administered questionnaire (QUEST)≥6 and/or endoscopic findings. | 2,853 | 1975/878 | 56.74 ± 10.68 | cross-sectional study |
| Masaki Miyamoto, 200744 | Eastern country（Japan) | GERD: Carlsson-Dent self-administered questionnaire≥6. | 241 | 95/146 | 67±9.5 | cohort study |
| Maria Pina Dore, 200832 | Western country （Italy) | GERD: Diagnosis was based on the combination of the presence of typical symptoms: heartburn or pyrosis, regurgitation, and dysphagia. | 500 | 169/331 | NA | case control study |
| Mirosław Jarosz, 201420 | Western country （Australia) | GERD: with symptoms of GERD (heartburn, acid eructation, sour–bitter taste in the mouth, pain in the upper abdomen and epigastric fullness after a meal, the sensation of a “lump in the throat”, chest pain, recurrent cough, and hoarse voice), with gastroscopically confirmed non-erosive disease or oesophagitis (graded according to Los Angeles classification). | 513 | 171/342 | 44.4±14.2 | case control study |
| Omid Eslami, 201748 | Eastern country（Iran) | GERD: diagnosed by gastroenterologist, those who with frequent (more than weekly) typical reflux symptoms including heartburn and acid regurgitation. | 505 | 156/349 | NA | cross-sectional study |
| Haoxiang Zhang,201954 | Eastern country（China) | GERD-Q≥8 | 5,680 | 3140/2540 | 38.9 ± 15.9 | cross-sectional study |
| Jia He,201056 | Eastern country（China) | GERD: According to the Montreal Definition. | 16,078 | 7688/8390 | 42.5±15.2。 | cross-sectional study |
| X.-Q. Ma, 200961 | Eastern country（China) | GERD: defined as heartburn and/or regurgitation of any reported frequency during the 1-week recall period of the RDQ questionnaire. | 919 | 410/509 | 46.7 ± 13.4 | cross-sectional study |
| Yan Gong, 201957 | Eastern country（China) | GERD-Q≥8 | 37,442 | 27274/10168 | NA | cross-sectional study |
| Ling-Zhi Yuan, 201958 | Eastern country（China) | GERD:RDQ≥12. | 1,518 | 757/761 | 48±14 | cross-sectional study |
| Juan Du, 200762 | Eastern country（China) | GERD:RDQ≥12. | 2,231 | 1263/968 | 43±18 | cross-sectional study |
| M Nilsson, 200430 | Western country （Norway) | GERD: experienced severe heartburn or acid regurgitation during the past 12 months. | 43,363 | 20369/22994 | 52±20 | case control study |
| Sushil Kumar, 201149 | Eastern country（India) | GERD: Presence of GERD was defined as a score of ≥4 using a previously validated symptom score based on the severity and frequency of heartburn and regurgitation. | 905 | 399/506 | 49.7±15.5 | cross-sectional study |
| Sudipta Dhar Chowdhury, 201950 | Eastern country（India) | GERD was defined as heartburn and regurgitation occurring at least twice per week. | 6,174 | 2599/3575 | 40±11.8 | cross-sectional study |
| Hai-Yun Wang, 201651 | Eastern country（India) | GERD:GERD-Q≥8 | 1,072 | 335/737 | 42±16.5 | cross-sectional study |
| Praveen Kumar Sharma, 201052 | Eastern country（India) | GERD: The subjects were asked about the frequency and severity of heartburn and/or regurgitation experienced by them in the previous year. These symptoms were then scored from 0 to 18. Subjects with a score of at least 4 were considered to have symptomatic GERD. | 4,039 | 2902/1137 | 35.7±9.6 | cross-sectional study |
| Shobna J. Bhatia, 201153 | Eastern country（India) | GERD was defined as heartburn and/or sour regurgitation at least once a week for at least one month. | 3,223 | 1647/1577 | 38.3±15.3 | cross-sectional study |
| Shahid Ahmed, 202034 | Eastern country（Pakistan) | GERD: “Ritcher Acid Scale “questionnaire for the screening of GERD, A cutoff point of two or greater was selected to confirm the presence of GERD. | 2,000 | 842/1158 | 37.3±10.47 | cross-sectional study |
| Shaha M, 201240 | Eastern country (Bangladesh) | GERD: A Bengali version of the questionnaire, originally developed & validated by Mantorela et. al was used for data collection. The questionnaire comprised of three sections; demographic data, common & uncommon GERD symptoms with frequency. A cutoff point 3 was chosen as a valid & reliable scale to confirm GERD, or GERD was defined as heartburn and/or acid regurgitation occurring at least weekly over the past year. | 2,000 | 1064/936 | 34.20±13.84 | cross-sectional study |
| P. J. Veugelers, 200622 | Western country （Canada) | GERD: Patients were diagnosed with GERD on the basis of dominant symptoms of heartburn and/or regurgitation, previous response to acid suppression therapy, with or without evidence of esophagitis diagnosed endoscopically and histologically from biopsies. The diagnosis of Barrett esophagus was established by the histologic finding of intestinal metaplasia within an endoscopically identified columnar-lined esophagus, which was confirmed independently by two consultant gastrointestinal histopathologists. | 431 | 288/143 | NA | case control study |
| Nabil Joseph Awadalla, 201947 | Eastern country (Saudi Arabia) | GERD:GERD-Q≥8 | 3,166 | 1432/1734 | 33.45±12.45 | cross-sectional study |
| Modh Said Rosaida, 200439 | Eastern country (Malaysia) | GERD: Patients with predominant symptoms of heartburn and/or acid regurgitation occurring at least once per month for the past 6 months were considered to have GERD. | 1,000 | 442/558。 | NA | cross-sectional study |
| ZHANG Min, 201863 | Eastern country（China) | GERD: Gerd-Q≥8 | 3,352 | 1815/1537 | 47.1±12.4 | cross-sectional study |
| YAO XiaoJun, 201864 | Eastern country（China) | GERD:RDQ≥12. | 3,015 | 1746/1269 | NA | cross-sectional study |
| JIANG Chenglin, 201666 | Eastern country（China) | GERD: GerdQ≥8 | 936 | 464/472 | 46± 15.9 | cross-sectional study |
| RONG Liang, 201368 | Eastern country（China) | GERD: GerdQ≥8 | 2,980 | 1540/1440 | NA | cross-sectional study |
| CHEN HuiXin, 200672 | Eastern country（China) | GERD:RDQ≥12. | 249 | 109/140 | NA | case control study |
| JIANG Chu, 201069 | Eastern country（China) | GERD:RDQ≥12. | 2,615 | 1178/1437 | 40.3±15.3 | cross-sectional study |
| SHEN XuDe, 201070 | Eastern country（China) | GERD: RDQ≥12. | 1,347 | 657/690 | 40.44±17.87 | cross-sectional study |
| LIN XiaoDan, 201873 | Eastern country（China) | GERD: GerdQ≥8 | 311 | 138/173 | NA | case control study |
| YUAN LinZHi, 201774 | Eastern country（China) | GERD: RDQ≥12 and PPI test positives. | 678 | 348/330 | NA | case control study |
| GAO HongLiang, 201275 | Eastern country（China) | GERD: RDQ≥12 or endoscopy find esophageal mucosal breaks.. | 240 | 142/98 | NA | case control study |
| YIN Yanwei, 201276 | Eastern country（China) | GERD: RDQ≥12. | 303 | 161/142 | 43.77±9.62 | cross-sectional study |
| JIANG Xuan, 201177 | Eastern country（China) | GERD: RDQ≥12. | 1,045 | 477/568 | NA | cross-sectional study |
| HU ShuiQing, 200978 | Eastern country（China) | GERD: RDQ≥12. | 1,265 | 541/724 | NA | cross-sectional study |
| ZHANG Hong, 200779 | Eastern country（China) | GERD: RDQ≥12. | 15,283 | 7611/7672 | NA | cross-sectional study |
| Olivia M Thompson, 200924 | Western country（American) | BE diagnosed by biopsy. | 352 | 309/178 | 53.8±12.6 | case control study |
| Ai Kubo, 200425 | Western country（American) | Diagnosis of Barrett’s esophagus using the International Classification of Disease, 9th revision (ICD-9) code 530.2 (which at KPNC is uniquely coded as “Barrett’s esophagitis”), or the College of American Pathologists code 73330 (“Barrett’s esophagus”). A single Boardcertified gastroenterologist (DAC) then reviewed the endoscopy and pathology records of potentially eligible cases. | 953 | 666/287 | NA | case control study |
| Li Jiao, 201326 | Western country（American) | BE:BE as confirmed by the presence of intestinalized columnar epithelia (confirmed by Alcian-PAS stain) in at least one biopsy samples obtained from tubular esophagus. | 928 | 860/68 | NA | case control study |
| Jessica L. Petrick, 201527 | Western country（American) | BE: BE was considered present if at least one biopsy specimen had specialized intestinal metaplasia. | 353 | 213/140 | NA | case control study |
| Douglas A. Corley, 200829 | Western country（American) | BE identified using the International Classification of Disease, 9th revision (ICD-9) code 530.2, which at KPNC is uniquely coded on reporting sheets as “Barrett’s esophagitis.” A single board-certified gastroenterologist (DAC) then reviewed the endoscopy and pathology records. | 944 | 660/284 | NA | case control study |
| Stephen Lam, 201733 | Western country（UK） | BE: endoscopic characteristics of Barrett’s oesophagus of at least 1 cm with histological confirmation of metaplasia. | 24,110 | 11122/12988 | NA | cohort study |
| Linda Sharp, 201310 | Western country （Ireland) | BE cases had histologically confirmed disease. RE cases had endoscopically visible inflammation. | 918 | 768/150 | NA | case control study |
| Helen G. Mulholland, 200912 | Western country （Ireland) | Barrett's esophagus patients were eligible for inclusion if ≥3 cm of typical Barrett's mucosa were seen at endoscopy, and the presence of specialized intestinal metaplasia was confirmed by histologic examination of biopsy specimens. Erosive esophagitis was defined as evidence of mucosal breaks or erosions within the esophagus. | 919 | 769/150 | NA | case control study |
| Qi Dai, 201614 | Western country （Ireland) | Non-dysplastic long-segment (≥3 cm) Barrett’s oesophagus cases were recruited if specialised intestinal metaplasia had been histologically confirmed. Reflux oesophagitis cases had erosions of the oesophageal mucosa diagnosed at endoscopy, classified as grades 2–4 or grades B, C or D using the Savary-Miller/Hetzel-Dent or Los Angeles methods(37), respectively. | 890 | 749/141 | NA | case control study |
| Nitin Shivappa, 201715 | Western country （Ireland) | BE: patients with long-segment BE, defined as >3 cm of non-dysplastic specialised intestinal metaplasia. Patients with RE , defined as having oesophageal erosions scored as grades 2–4 on the Savary-Miller/ Hetzel-Dent scale or grades B, C or D on the Los Angeles scale. | 919 | 769/150 | NA | case control study |
| RA Filiberti, 201731 | Western country （Italy) | BE cases were enrolled among those with an endoscopic 15 mm upward displacement of the squamocolumnar junction (Z-line) from the gastro esophageal junction at endoscopy, and with specialized intestinal metaplasia with ‘goblet’ cells on histology. | 1,420 | 766/654 | NA | case control study |
| Aaron P. Thrift, 201117 | Western country (Australia) | BE was defined as the presence of specialized intestinal metaplasia in an esophageal biopsy taken from the tubular esophagus by upper gastro-intestinal endoscopy, irrespective of the length of involvement. | 1,350 | 828/522 | NA | case control study |
| Torukiri I. Ibiebele, 201318 | Western country (Australia) | Barrett’s esophagus was defined as the presence of specialized intestinal metaplasia (columnar epithelium with goblet cells) in a biopsy taken from the esophagus by upper gastrointestinal endoscopy, regardless of the length of involvement. | 944 | 616/328 | NA | case control study |
| Jessie Steevens, 201021 | Western country (Netherland) | BE:BE definition included only subjects with esophageal SIM or with a pathology report stating "Barrett’s," without a description of the type of metaplasia. | 4,236 | 2106/2130 | 61.2±4.2 | cohort study |
| Yan-Hua Chen, 201959 | Eastern country（China) | BE was defined based on extension of the columnar epithelium ≥ 1 cm above the gastroesophageal junction and was confirmed based on the presence of specialized intestinal metaplasia (IM) in the metaplastic esophageal epithelium. | 3,385 | 1932/1453 | 51.29 ± 11.42 | cross-sectional study |
| S. Peng, 200960 | Eastern country（China) | The diagnosis of Barrett’s esophagus was confirmed by the presence of specialized intestinal metaplasia containing goblet cells. Erosive esophagitis was defined endoscopically by visible breaks of the distal esophageal mucosa and evaluated for severity according to the LA classification of esophagitis. | 2,580 | 1277/1303 | 45.11±14.24 | cross-sectional study |
| YIN CaiQiao, 201667 | Eastern country（China) | Barrett’s esophagus was confirmed by the presence of specialized intestinal metaplasia | 12,265 | 5437/6828 | NA | cross-sectional study |
| Anna Boguradzka, 201119 | Western country （Australia) | GERD: Information concerning possible symptoms of reflux disease was collected using the 9‑question Carlsson’s questionnaire. The score of 4 points or more was considered positive. | 2,000 | 949/1051 | 41.1±15.6 | cross-sectional study |
| Su Youn Nam, 201635 | Eastern country（Korea) | Reflux esophagitis was defined as endoscopic esophagitis. NERD was defined as at least weekly typical GERD symptoms (heartburn or acid regurgitation) without endoscopic esophagitis. | 11,690 | 6276/5414 | NA | cross-sectional study |
| Ji Min Choi, 201837 | Eastern country（Korea) | Based on the Montreal definition, we defined GERD as the presence of heartburn (burning sensation in the retrosternal area) and/or acid regurgitation (perception of reflux of stomach contents into the mouth or the hypopharynx) occurring at least once a week. with endoscopically proven esophageal mucosal erosions/ulcers were classified as the ERD group, and the remaining subjects were classified as the NERD group. | 19,099 | 12294/6805 | NA | cross-sectional study |
| Hideyuki Chiba, 201242 | Eastern country（Japan) | RE: The endoscopists graded the reflux esophagitis using the Los Angeles (LA) classification system with Japanese modification. | 4,990 | 3871/1119 | NA | cross-sectional study |
| C. H. Park, 201238 | Eastern country（Korea) | RE was defined based on the endoscopic findings according to the Los Angeles (LA) classification, which is based on the length of the longest mucosal break, and confluence of erosions, regardless of reflux symptom. | 2,226 | 1380/846 | NA | case control study |
| Naomi Mochizuki, 201846 | Eastern country（Japan) | EE was diagnosed based on the presence of endoscopically detectable mucosal breaks and was graded according to the Los Angeles (LA) classification. | 7,552 | 4766/2786 | NA | cohort study |
| LESLEY A. ANDERSON, 200911 | Western country （Ireland) | Erosive esophagitis was defined as evidence of mucosal breaks or erosions within the esophagus (grades 2–4 in the Savary Miller/Hetzel Dent classification or grades B, C, or D in the Los Angeles classification were included). | 941 | 786/155 | NA | case control study |
| Mark G. O’Doherty, 201113 | Western country （Ireland) | RE patients were included if there was macroscopically visible erosive esophagitis at endoscopy (grades 2–4 in the Savary Miller/Hetzel-Dent classification or grades B, C, or D in the Los Angeles classification). | 919 | 769/150 | NA | case control study |
| Seamus J. Murphy, 201016 | Western country （Ireland) | Erosive esophagitis was defined as mucosal breaks or erosions within the esophagus (grades 2–4 in the Savary Miller/Hetzel-Dent classification or grades B, C, or D in the Los Angeles classification were included). | 919 | 769/150 | NA | case control study |
| Kun Wang, 201955 | Eastern country（China) | RE was diagnosed and classified as grade A to D according to the Los Angles Classification. | 2,844 | 1418/1426 | 57.36 ± 6.96 | cross-sectional study |
| Nobuyuki Matsuki, 201345 | Eastern country（Japan) | NERD: Subjects who had no evidence of EE with an FSSG score of eight points or more and an FSSG score of four points or more for acid reflux-related symptoms were defined as the NERD group. | 886 | 547/339 | NA | cross-sectional study |
| CHEN LiPing, 201671 | Eastern country（China) | The diagnosis is confirmed by the digestive specialist according to the NERD diagnostic guidelines | 656 | 316/340 | 42.66±11.90 | case control study |
| WANG Yi, 201865 | Eastern country（China) | GERD: Gerd-Q≥8，endoscopically proven esophageal without mucosal erosions/ulcers，PPI test is positive。 | 200 | 82/118 | NA | case control study |

**Abbreviations:** GERD, gastroesophageal reflux disease. NERD, nonerosive gastroesophageal reflux disease. RE, Reflux esophagitis. BE, Barrett’s esophagus. RDQ: reflux diagnostic questionnaire. Gerd-Q, Gastroesophageal reflux disease questionnaire.NA, not available.

APPENDIX 3

Appendix 3 Diet and lifestyle factors related to GERD

| **Diet and lifestyle ‘s categories** | **Details about the categories** | **Articles that are positively related (n)** | **Articles that are negatively related (n)** | **Cohort study (n)** | **Case control study (n)** | **Cross-sectional study (n)** |
| --- | --- | --- | --- | --- | --- | --- |
| Dietary pattern | non-Mediterranean diet,8 consumption of non-vegetarian food,53 no intake of meat49 | 1 | 2 | 0 | 0 | 3 |
| dietary habits | Habit of midnight snacks,34 skipping breakfast,34 eating quickly,58, 74 eating very hot foods,58, 74 eating beyond fullness58, 64, 68, 70, 74, 76, 78, 79 | 10 | 0 | 0 | 2 | 8 |
| habits after a meal | lying down soon after eating,58 Post dinner physical activity (lying),34 Post dinner physical activity ( sitting ),34 Post dinner physical activity (walking),34 | 2 | 1 | 0 | 0 | 2 |
| Coffee | Coffee 30 | 0 | 1 | 0 | 1 | 0 |
| Tea | Tea,23, 73 strong tea drinking,62, 66, 68, 79 peppermint tea,20 green tea,43 lower intake of salt tea,49 Tibetan sweet tea54 | 9 | 1 | 0 | 2 | 8 |
| beverage | Soft drink23 | :1 |  |  |  | 1 |
| milk | infrequent milk intake50 | 1 | 0 | 0 | 0 | 1 |
| Fruit | fruit,49, 57 citrus,23 Citrus intake Between meals48 | 1 | 3 | 0 | 0 | 4 |
| Vitamins | vitamin C22 | 0 | 1 | 0 | 1 | 0 |
| Salt | Salt intake,57 extra salt on regular meals,30 Table salt use30 | 1 | 1 | 0 | 1 | 1 |
| taste and flavour of food | spicy,75sweet,64, 70, 79 | 4 | 0 | 0 | 1 | 3 |
| staple food | bread high in dietary fibre content: hard bread 30 | 0 | 1 | 0 | 1 | 0 |
| Protein | Tibetan dried meat,54 Daily meat, fish, and egg intake57 | 2 | 0 | 0 | 0 | 2 |
| Fat | fried food,9 greasy food,62, 63, 66, 78, 79 high fat diet,64, 68 total fat23 | 8 | 1 | 0 | 0 | 9 |
| Smoking related | Smoking,30, 34, 57, 58, 63 ，Current smoker, 9, 34, 52 ，Former smoker,9 | 9 | 0 | 0 | 1 | 8 |
| Drinking related | alcohol,22, 39, 57, 68, 73, 76, 77 liquor,64 beer,23 Tibetan barley wine54 | 9 | 1 | 0 | 2 | 8 |
| Psychological status | Depressed mood,36 strong psychological stress,64, 69, 72, 78 poor mental state69 | 5 | 0 | 0 | 1 | 4 |
| Marriage status | divorced/widowed,62, 72 widowed/widowers,40 married40 | 3 | 0 | 0 | 1 | 2 |
| Education | Primary,32, 40 higher educational level39, 48, 54, 69 | 5 | 1 | 0 | 1 | 5 |
| Sleep | poor sleep quality,36 Feeling of inadequate sleep,34, 73 Insomnia,47 hours of sleep,43 staying up late54 | 5 | 1 | 0 | 1 | 5 |
| occupation related traits | sedentary lifestyle,49physical labour,77, 79 night shift79 | 3 | 0 | 0 | 0 | 4 |
| Exercise | never exercise,32 physical inactivity,9 Exercise time less than 30 minutes,34 exercise,43 physical activity,57 exercise daily >30 minutes30, 34 | 3 | 4 | 0 | 2 | 4 |
| dinner to bed time interval | Dinner within two hours before going to sleep,34 Eat 2h before bed,73 dinner-to-bed time was less than 3 h41 | 3 | 0 | 0 | 2 | 1 |
| Abdominal pressure related | The belt too tight,74 wearing girdles or corsets,58 constipation44, 64, 70, 75, 78, 79 | 8 | 0 | 1 | 2 | 5 |
| Living environment | altitude of residence,54 length of residence,54 rural,56, 69 urban dwelling50, 51, 61 | 6 | 0 | 0 | 0 | 6 |
| Others | Pan masala chewing51 | 1 | 0 | 0 | 0 | 1 |

**Notes:** consumption of non-vegetarian food 53(no/yes).

**Abbreviations:** GERD, gastroesophageal reflux disease.

APPENDIX 4

Appendix 4 Diet and lifestyle factors related to NERD.

| **Diet and lifestyle‘s categories** | **Details about the categories** | **Articles that are positively related (n)** | **Articles that are negatively related (n)** | **Cohort study (n)** | **Case control study (n)** | **Cross-sectional study (n)** |
| --- | --- | --- | --- | --- | --- | --- |
| dietary habits | Habit of midnight snacks,71 eating beyond fullness65 | 2 | 0 | 0 | 2 | 0 |
| tea | tea35 | 0 | 1 | 0 | 0 | 1 |
| milk | milk35 | 0 | 1 | 0 | 0 | 1 |
| vegetables | beans35 | 0 | 1 | 0 | 0 | 1 |
| fruits | fruits35 | 0 | 1 | 0 | 0 | 1 |
| taste and flavour of food | raw or cold food, spicy65 | 1 | 0 | 0 | 1 | 0 |
| egg | egg35, 45 | 1 | 1 | 0 | 0 | 2 |
| fat | Greasy food62 | 1 | 0 | 0 | 0 | 1 |
| Energy | Total energy35 | 1 | 0 | 0 | 0 | 1 |
| Smoking related | Current smoker35, 37 | 2 | 0 | 0 | 0 | 2 |
| Drinking related | alcohol71, alcohol‑abusing19 | 1 | 0 | 0 | 1 | 0 |
| psychological status | depression37, 65, state anxiety, trait anxiety37 , anxiety65, anxiety or depression71, strong psychological stress45 | 4 | 0 | 0 | 2 | 2 |
| marriage state | married37 | 0 | 1 | 0 | 0 | 1 |
| sleep | insomnia45 | 1 | 0 | 0 | 0 | 1 |
| Abdominal pressure related | constipation62 | 1 |  |  |  | 1 |
| others | snore71 | 1 | 0 | 0 | 1 | 0 |

**Abbreviations:** NERD, nonerosive gastroesophageal reflux disease.

APPENDIX 5

Appendix 5 Diet and lifestyle factors related to RE.

| **Diet and lifestyle‘s categories** | **Details about the categories** | **Articles that are positively related (n)** | **Articles that are negatively related (n)** | **Cohort study (n)** | **Case control study (n)** | **Cross-sectional study (n)** |
| --- | --- | --- | --- | --- | --- | --- |
| dietary habits | frequent liquid food consumption55 | 1 | 0 | 0 | 0 | 1 |
| coffee | coffee38 | 1 |  | 0 | 1 | 0 |
| tea | strong tea drinking62 | 1 | 0 | 0 | 0 | 1 |
| vitamins | vitamin-C,16 folate, vitamin-B2, vitamin-B610 | 0 | 2 | 0 | 2 | 0 |
| micronutrient | magnesium14 | 0 | 1 | 0 | 1 | 0 |
| staple food | starch12 | 1 | 0 | 0 | 1 | 0 |
| protein | processed meat13 | 1 | 0 | 0 | 1 | 0 |
| fat | saturated fat, monounsaturated fat, total fat13 | 1 | 0 | 0 | 1 | 0 |
| energy | Total energy35 | 1 | 0 | 0 | 0 | 1 |
| Smoking related | smoking,38, 42, 55 Current smoker35, 37, 46 | 6 | 0 | 1 | 1 | 4 |
| Drinking related | Alcohol,35, 42, 46, 60 Total alcohol consumption at age 21 years,11  Wine consumption at 5 Years Prior to Interview11 | 5 | 1 | 1 | 1 | 3 |
| psychological status | Depression, state anxiety,37 strong psychological stress46 | 2 | 0 | 1 | 0 | 1 |
| marriage state | divorced/widowed,62  married37 | 0 | 2 | 0 | 0 | 2 |

**Abbreviations:** RE, Reflux esophagitis.

APPENDIX 6

Appendix 6 Diet and lifestyle factors related to BE.

| **Diet and lifestyle ‘s categories** | **Details about the categories** | **Articles that are positively related (n)** | **Articles that are negatively related (n)** | **Cohort study (n)** | **Case control study (n)** | **Cross-sectional study (n)** |
| --- | --- | --- | --- | --- | --- | --- |
| coffee | former coffee drinkers31 | 1 | 0 | 0 | 1 | 0 |
| tea | tea59 | 1 | 0 | 0 | 0 | 1 |
| vegetables | vegetables, 24 dark green vegetable, bean, 26 vegetable and fruit24 | 0 | 2 | 0 | 2 | 0 |
| Fruits | fruit18 | 1 | 0 | 0 | 1 | 0 |
| vitamins | vitamin-E26、vitamin-C, 22 folate,10, 26 vitamin-B6,10 vitamin-B1210 , isoflavones, lutein26, anthocyanidins27 | 1 | 5 | 0 | 5 | 0 |
| Antioxidant correlation | Dietary inflammatory index15 | 1 | 0 | 0 | 1 | 0 |
| micronutrient | magnesium14、dietary iron intake29 | 0 | 2 | 0 | 2 | 0 |
| Fat | .high fat diet67 | 1 |  | 0 |  | 1 |
| Fiber | Total fiber,12, 26 | 0 | 2 | 0 | 2 | 0 |
| Smoking related | Former smoker21 | 1 | 0 | 1 | 0 | 0 |
| Drinking related | alcohol, 22, 60 wine, 25 beer17 | 2 | 2 | 0 | 3 | 1 |
| occupation related traits | standing occupation33 | 0 | 1 | 1 | 0 | 0 |

**Abbreviations:** BE, Barrett’s esophagus.
